# Supplementary material for: Variation in the ACE2 receptor has limited utility for SARS-CoV-2 host prediction
Source: eLife journal article supplement (doi:10.7554/elife.80329), 2022-10-17
Supplement: figures [file elife-80329-figures-v1.pdf]

---

## Figures and figure supplements

Variation in the ACE2 receptor has limited utility for SARS-CoV-2 host prediction

**Nardus Mollentze et al.**

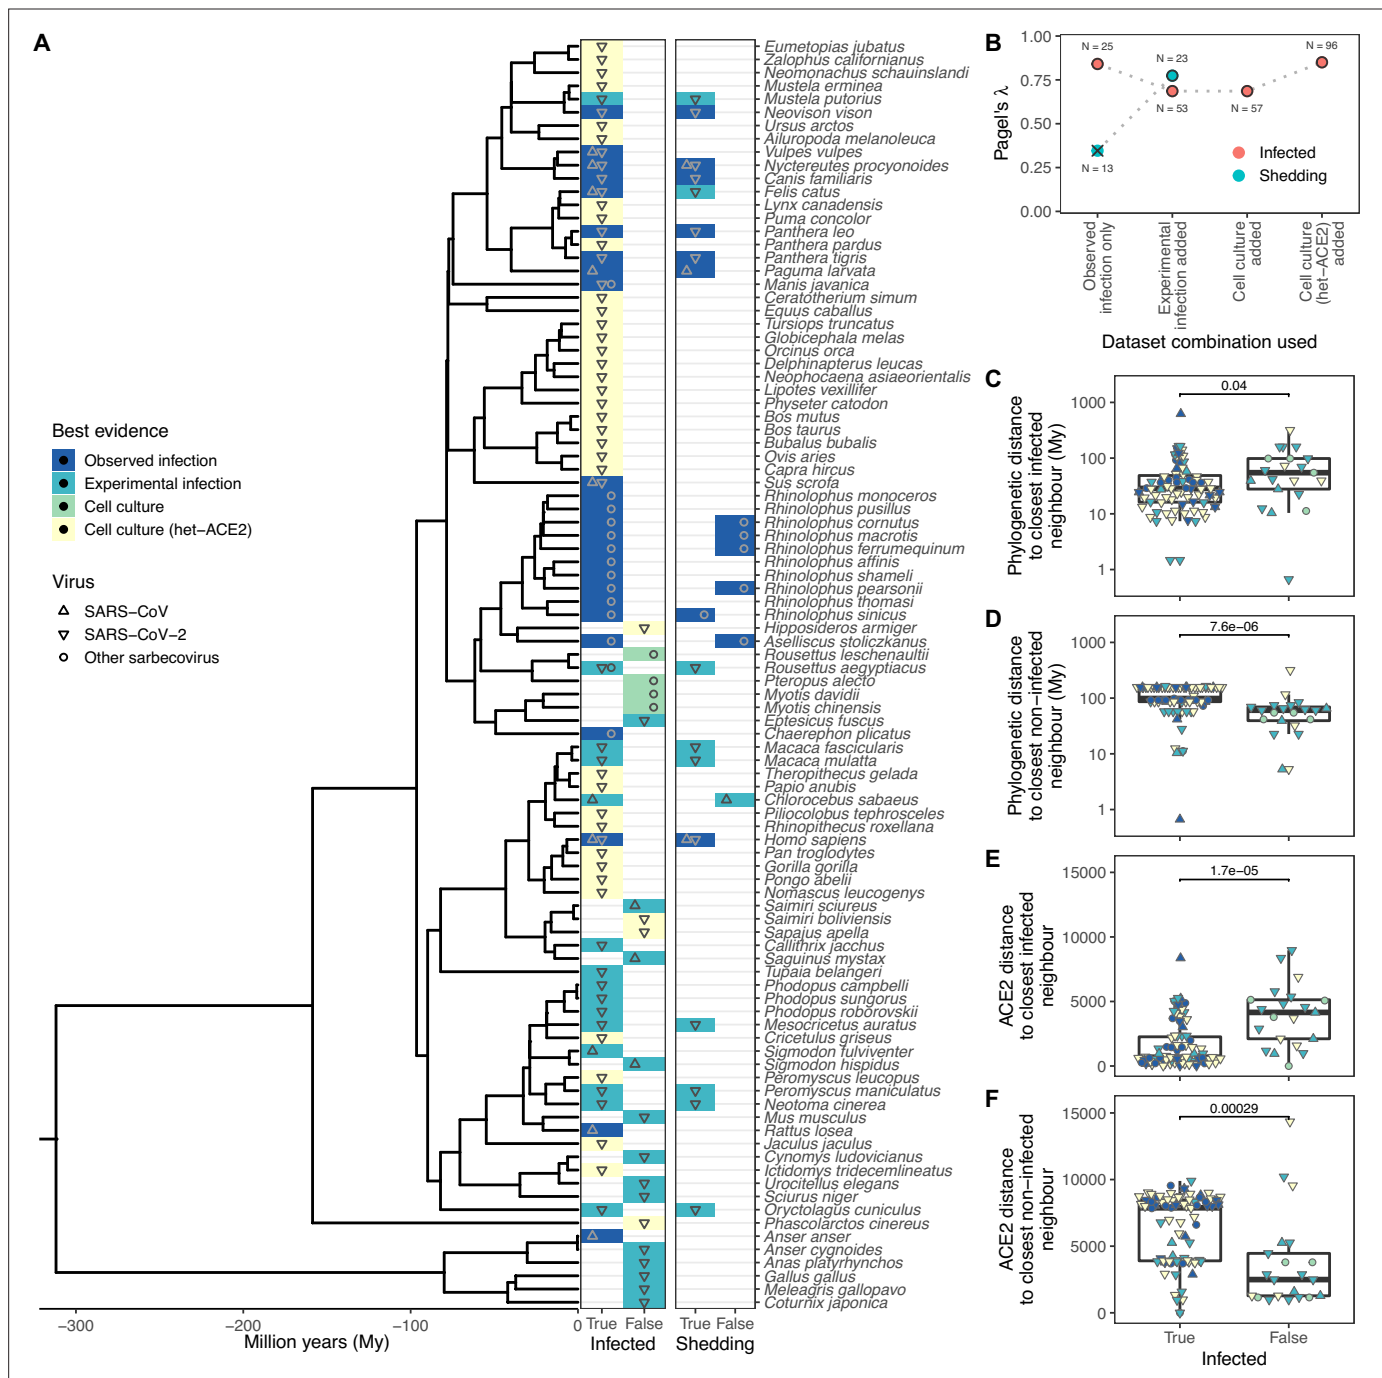

**Figure 1.** Phylogenetic clustering of sarbecovirus host susceptibility and shedding data. (A) Species for which susceptibility to infection and shedding of infectious virus have been assessed. Colours indicate the best available evidence, while symbols show the viruses involved. Blank rows in the shedding panel indicate missing data. A composite phylogeny derived from TimeTree indicates evolutionary relationships and median estimated divergence times. (B) Measurements of phylogenetic clustering when considering increasingly relaxed evidence quality thresholds, based on the phylogeny in (A). Outlined circles show likelihood ratio p-values  $\leq 0.003$ , indicating greater clustering of infection records than expected by chance, while the cross indicates a p-value of 0.186. (C–D) Pairwise cophenetic distances between each host and its closest infected (C) or non-infected (D) neighbour. (E–F) Total Grantham distance between the angiotensin-converting enzyme 2 (ACE2) sequence of each host and its closest infected (E) or non-infected (F) neighbour. p-Values from a Wilcoxon rank sum test are indicated in (C–F), and overlapping values from different hosts are jittered horizontally. Note that while both p-values and boxplots are based on a single value for each host, overlapping symbols at the same position are used to indicate different viruses (e.g., a species known to be susceptible to both SARS-CoV [▲] and SARS-CoV-2 [▼] would be indicated using a star formed of overlapping triangles).

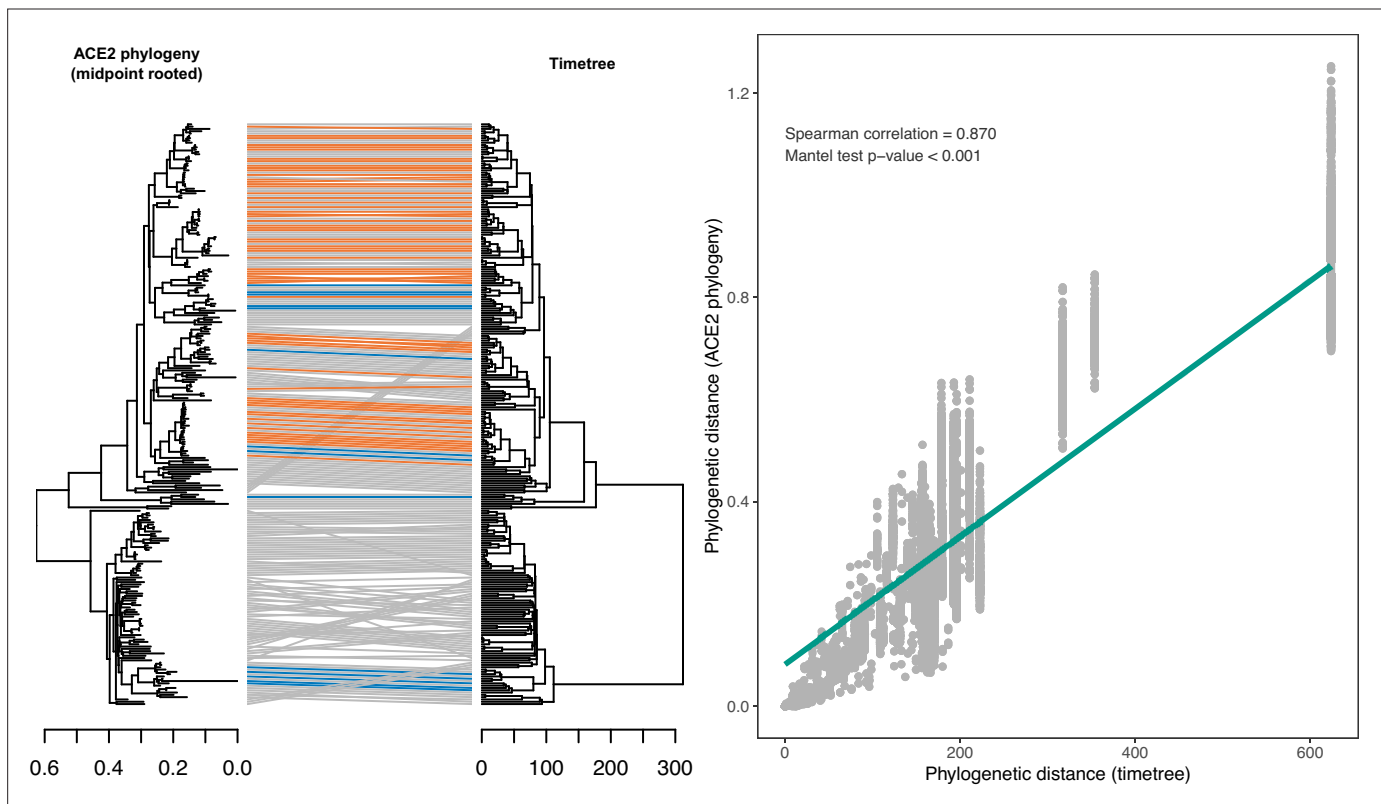

**Figure 1—figure supplement 1.** Congruence between a phylogeny reconstructed from ACE2 amino acid sequences and a consensus time-scaled phylogeny for mammals and birds obtained from the TimeTree database. **(A)** Tanglegram linking species across the two phylogenies, with sarbecovirus-susceptible species indicated in orange and putatively non-susceptible species in blue. Grey lines indicate species with unknown susceptibility. The maximum likelihood ACE2 phylogeny was constructed using an alignment of all available ACE2 ortholog sequences from species also occurring in the TimeTree database (N=253). The TimeTree phylogeny was trimmed to contain the same species. **(B)** Correlation between pairwise cophenetic distances calculated from the two phylogenies. A linear regression trendline is shown for visualisation purposes only.

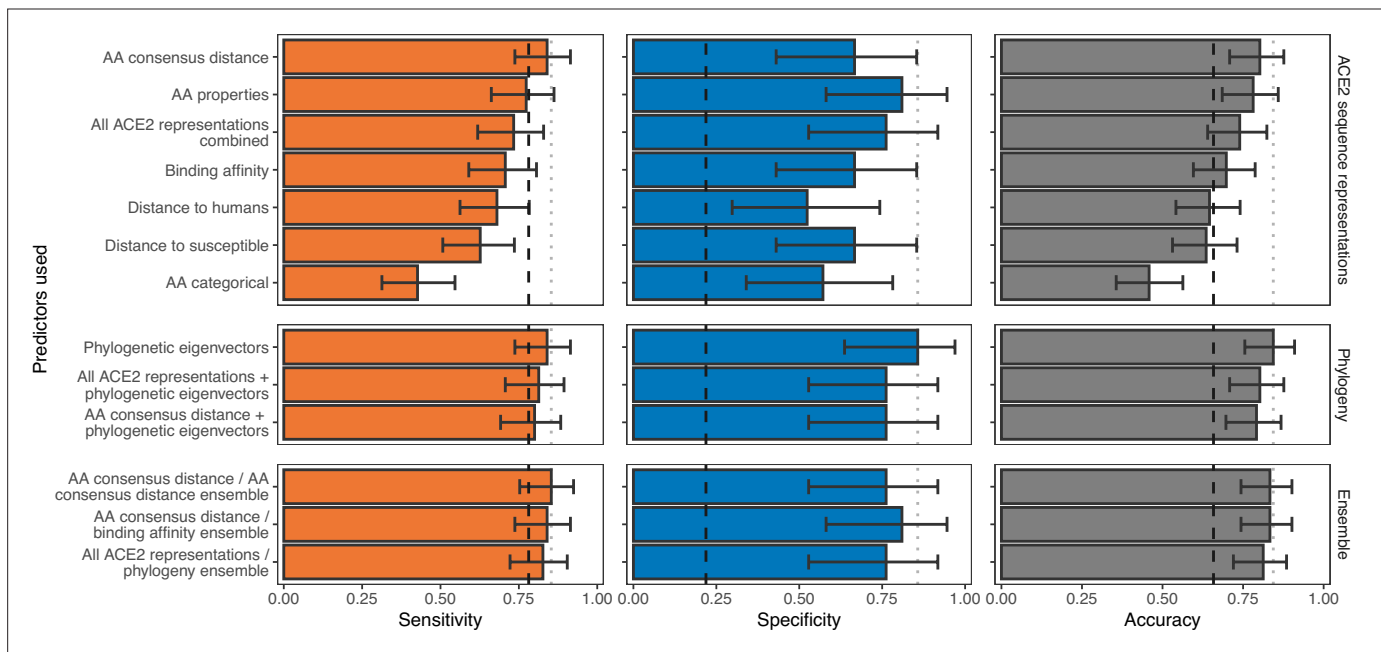

**Figure 2.** Ability of models trained on different representations of either ACE2 sequences or a time-scaled amniote phylogeny to predict host susceptibility to sarbecovirus infection. Bars represent proportions from leave-one-out cross-validation, with error bars indicating 95% binomial confidence intervals. Dashed vertical lines indicate the performance expected from a null model which randomly assigns susceptibility in proportion to its frequency in the training data (78.12% of available hosts are considered susceptible, N=96). Dotted vertical lines highlight performance of the best model in each panel.

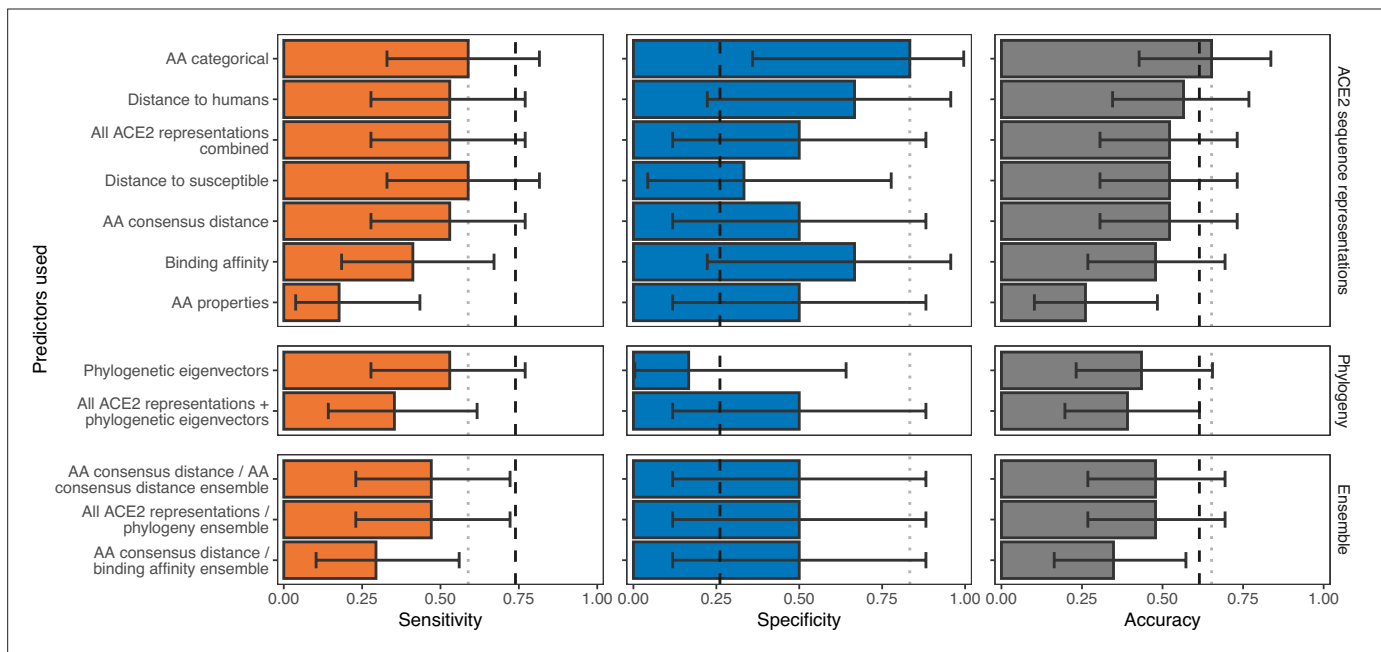

**Figure 2—figure supplement 1.** Ability of models trained on different representations of either ACE2 sequences or a time-scaled amniote phylogeny to predict shedding of infectious virus after sarbecovirus infection. Bars represent proportions from leave-one-out cross-validation, with error bars indicating 95% binomial confidence intervals. Dashed vertical lines indicate the performance expected from a null model which randomly assigns shedding/non-shedding labels in proportion to their frequency in the training data (73.9% of hosts were reported to shed infectious virus, N=23). Dotted vertical lines highlight performance of the best model in each panel. The low number of species for which their ability to shed infectious virus has been reported means no tested model currently outperforms random guessing across both sensitivity and specificity.

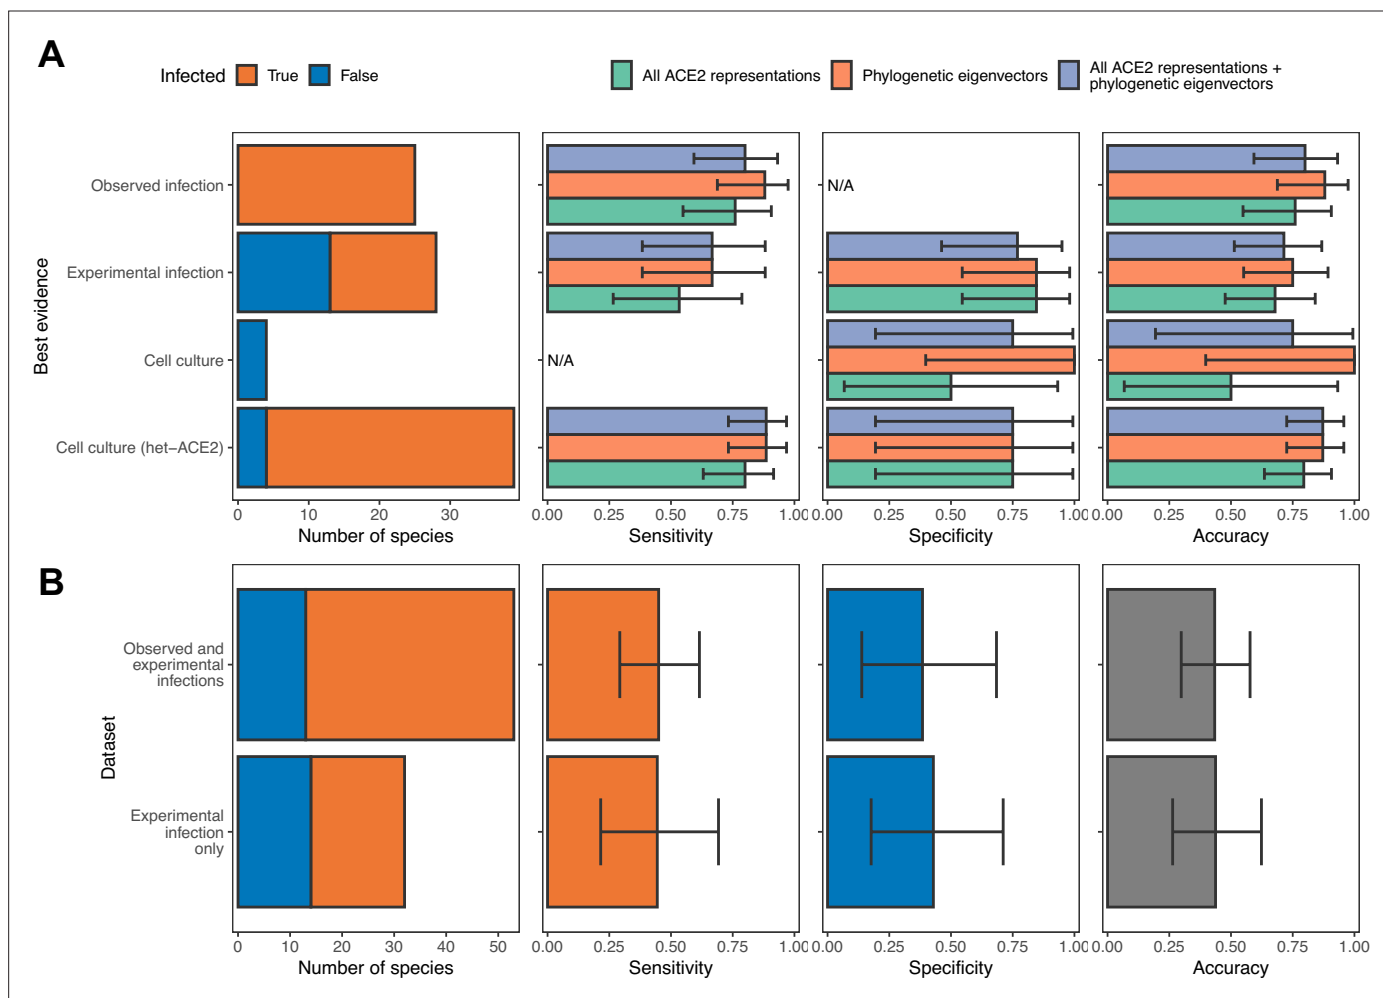

**Figure 2—figure supplement 2.** Influence of different sources of sarbecovirus susceptibility data on prediction accuracy. **(A)** Performance of different models trained on all available data. Holdout predictions for individual species were grouped by the best available evidence of susceptibility or non-susceptibility to calculate performance metrics only. N/A indicates no suitable observations in a given category (e.g., cell culture data added no new susceptible species, meaning we cannot calculate the sensitivity of models on cell culture data). These are the same models as in **Figure 2**. **(B)** Performance of two alternative models trained using all ACE2 representations combined with phylogenetic eigenvectors, but with subsets of the full dataset as training data. The first panel in both rows indicates the size of each data subset. In all other panels, bars represent proportions from leave-one-out cross-validation, with error bars indicating 95% binomial confidence intervals. Since there are no consistent trends in model performance across data sources in **(A)**, we conclude that the inclusion of cell culture and heterologous ACE2-based data are not affecting our ability to compare different models. In contrast, removing these data sources leads to severe decreases in model performance, likely due to low sample sizes **(B)**. This identifies cell culture experiments, including experiments testing only binding of heterologous ACE2, as useful additional sources of compatibility data when this would otherwise be limited.

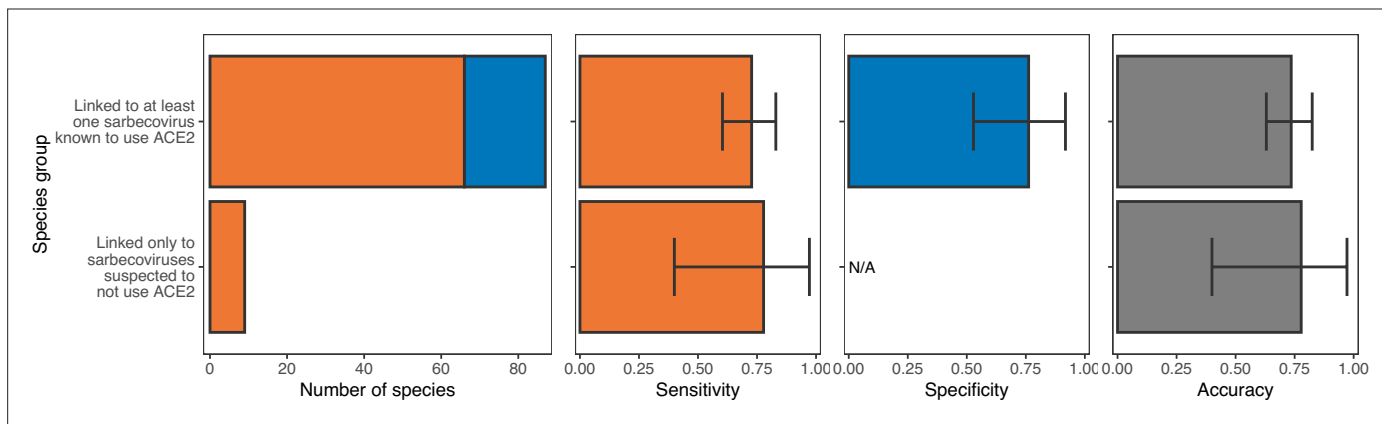

**Figure 2—figure supplement 3.** Performance of a model trained with all ACE2 representations on hosts linked to sarbecoviruses not known to use ACE2. The model was trained on all hosts, with performance evaluated using leave-one-out cross-validation. In the first panel, bars represent sample sizes for susceptible species (orange) and non-susceptible species (blue). In all other panels, bars represent the proportion of species in each category accurately predicted, with error bars indicating 95% binomial confidence intervals. Similar performance suggests that ACE2-based models are equally capable of predicting the susceptibility of species thus far linked only to non-ACE2-utilising sarbecoviruses and those linked to other sarbecoviruses.

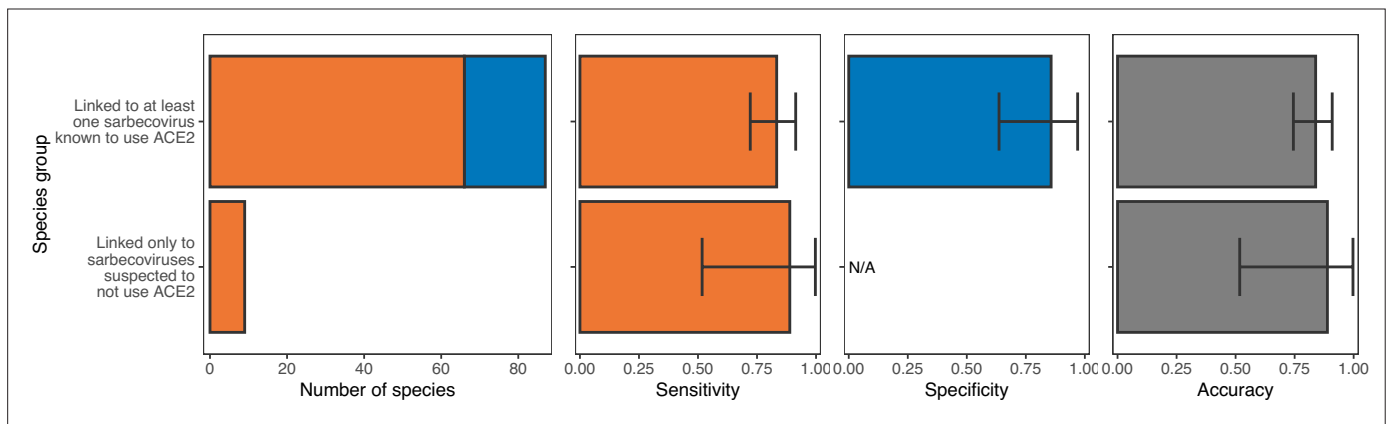

**Figure 2—figure supplement 4.** Performance of a model trained with phylogenetic eigenvectors on hosts linked to sarbecoviruses not known to use ACE2. The model was trained on all hosts, with performance evaluated using leave-one-out cross-validation. In the first panel, bars represent sample sizes for susceptible species (orange) and non-susceptible species (blue). In all other panels, bars represent the proportion of species in each category accurately predicted, with error bars indicating 95% binomial confidence intervals. As was the case for ACE2-based models (**Figure 2—figure supplement 3**), phylogeny-based models are equally capable of predicting the susceptibility of species thus far linked only to non-ACE2-utilising sarbecoviruses and those linked to other sarbecoviruses.



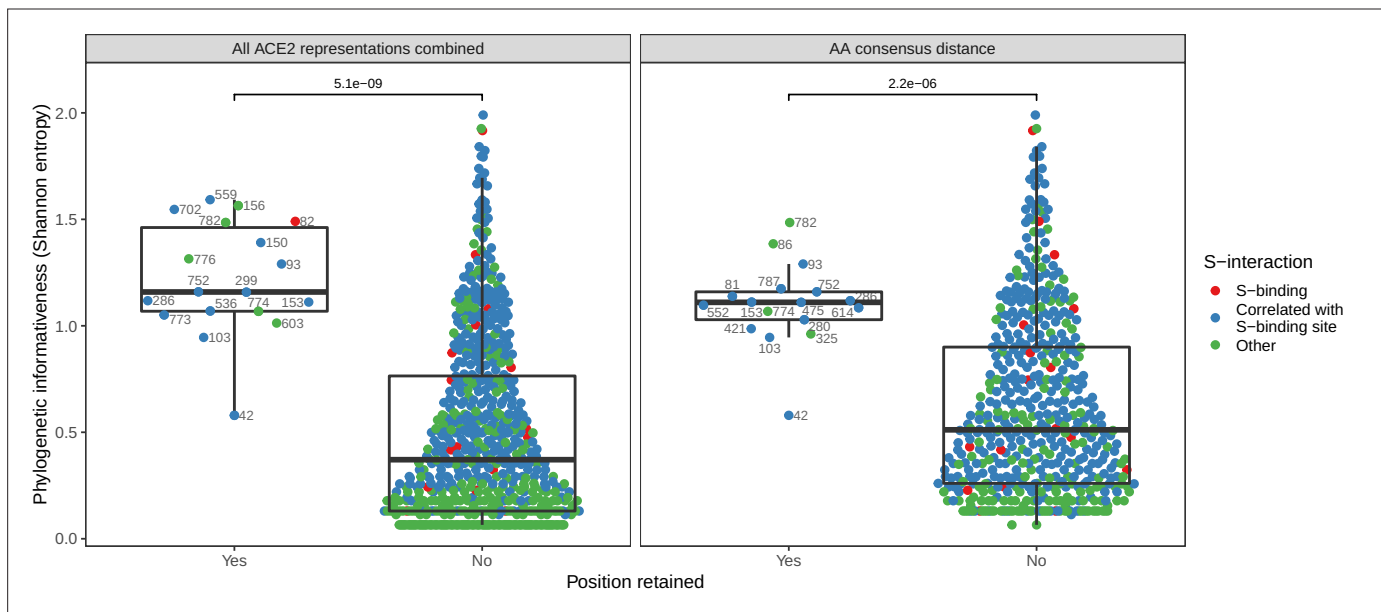

**Figure 3.** Phylogenetic informativeness of all ACE2 amino acid positions available for selection in the model. Positions are stratified by whether or not they form part of any features retained by the combined ACE2-based model (i.e., the model trained with access to all ACE2 representations, left panel) or the best-performing ACE2-based model, which lacked binding affinity information (right panel). Colours indicate whether the site in question is known to interact with the SARS-CoV-2 spike protein (based on annotations in the human reference sequence, accession number NP\_001358344.1) or belongs to a cluster of correlated features which also contains at least one such spike-interacting site. Clusters were obtained using affinity propagation clustering of pairwise Spearman correlations between sites. p-Values obtained through a Wilcoxon rank sum test. Sequence positions indicated next to selected points refer to locations in the human ACE2 reference sequence. Overlapping points are jittered horizontally.

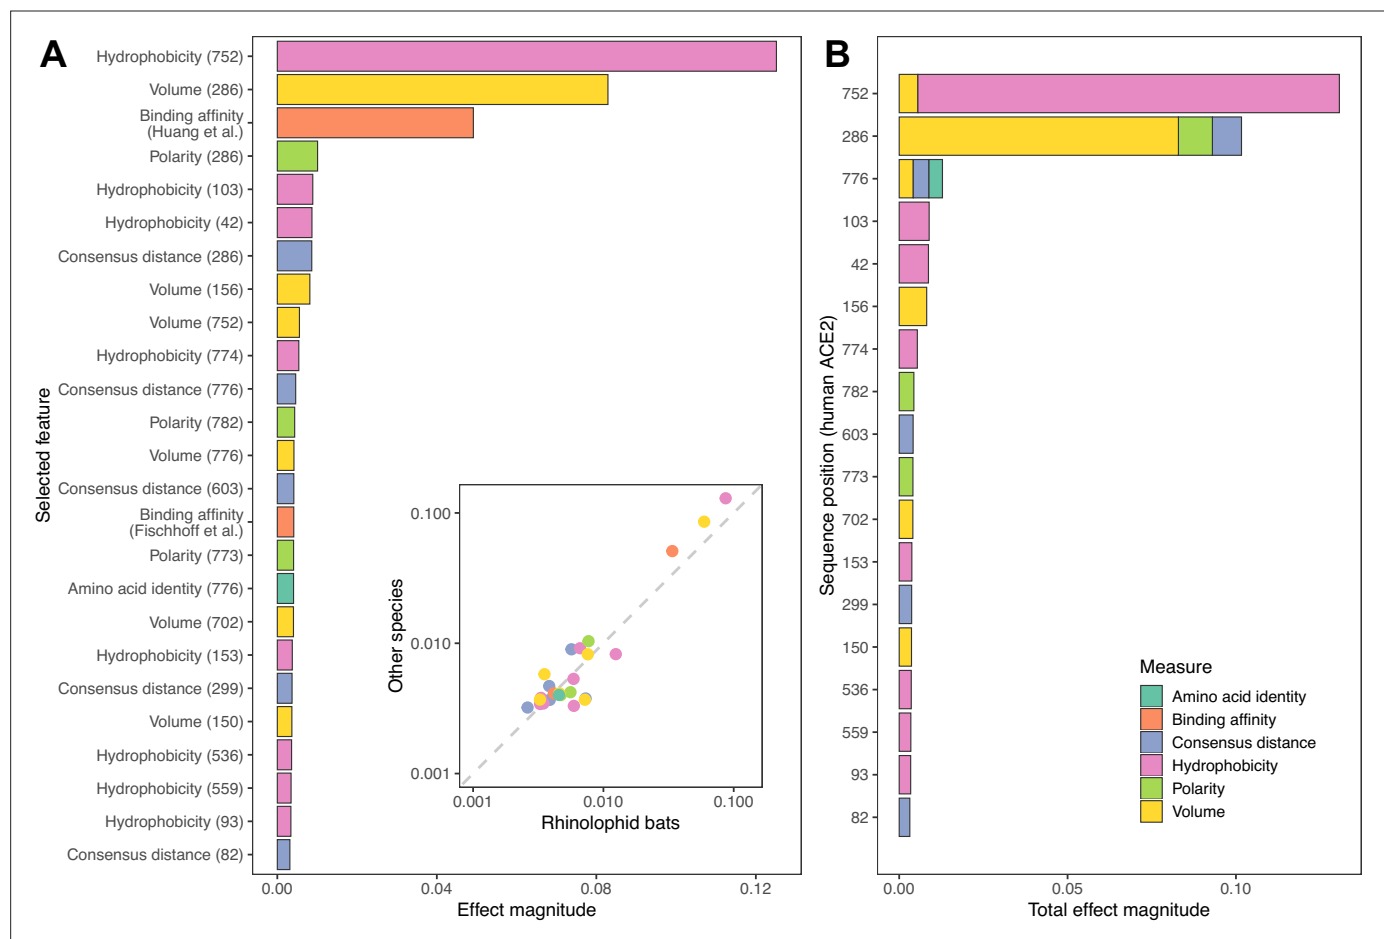

**Figure 3—figure supplement 1.** Features retained and used by the combined ACE2-based model for predicting susceptibility to sarbecovirus infection. **(A)** Importance of individual features in determining final predictions. Importance was measured using mean absolute SHAP values across all host species in the training data. An inset shows the same mean effect magnitudes calculated separately for rhinolophid bats and other species, with a dashed line indicating a 1:1 relationship. Both axes of the inset plot are shown on a  $\log_{10}$  scale for clarity. Since all effect magnitudes are similar between rhinolophid bats and other species (indicated by being close to the dashed line), we conclude that the ACE2-based model trained on all species uses the same limited number of features and sequence positions to predict susceptibility of both groups. **(B)** Combined importance for individual ACE2 sequence positions, obtained by summing values from **(A)** whenever features represent the same position. Sequence positions refer to locations in the human ACE2 reference sequence (accession number NP\_001358344.1).

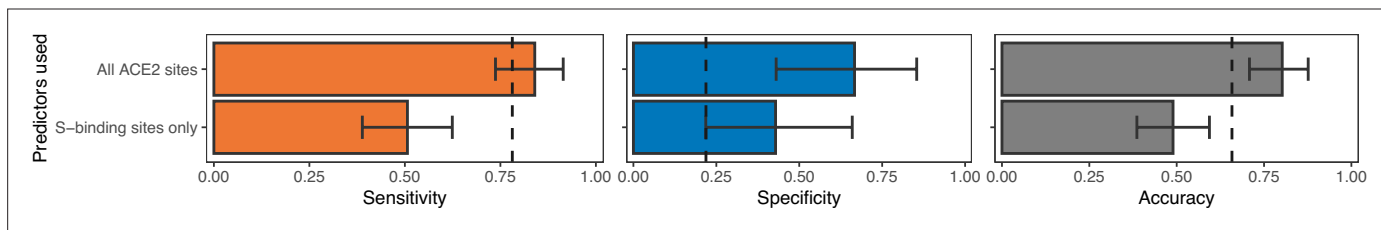

**Figure 3—figure supplement 2.** Model performance when training the best-performing non-ensemble ACE2-only model ('AA consensus distance') with access to either all sites (as in **Figure 2**) or with representations of known SARS-CoV-2 spike-binding sites only. Both models represent individual ACE2 sites as a distance between the observed amino acid and the most common amino acid at that site among known susceptible species. Spike-binding sites were identified from annotations to the human ACE2 sequence (accession number NP\_001358344.1). Removing phylogenetically informative sites to focus on ACE2 positions with known mechanistic links to susceptibility decreases our ability to predict susceptibility to sarbecovirus infection.

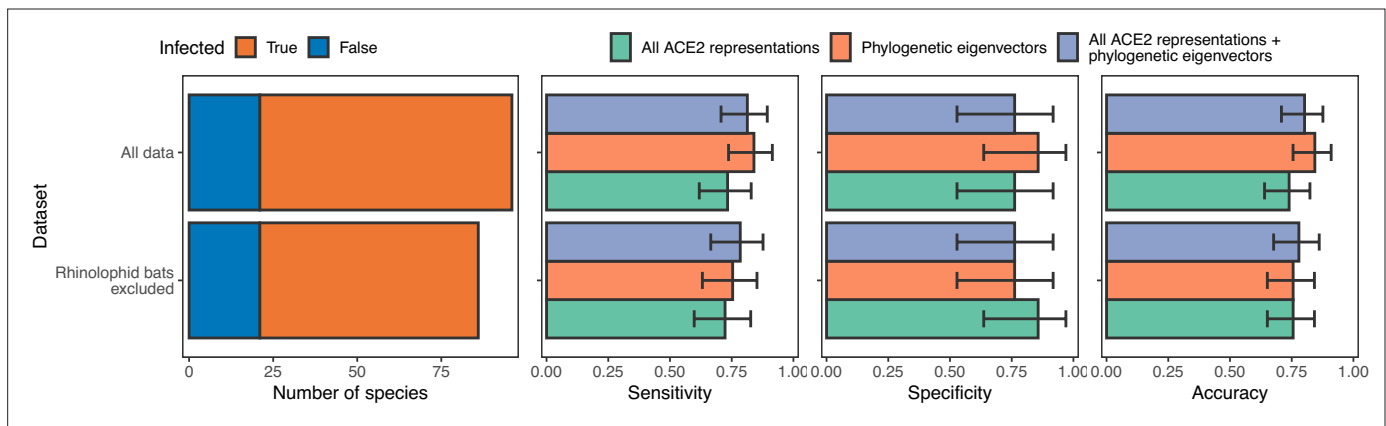

**Figure 3—figure supplement 3.** Model performance after training with and without data from rhinolophid bats. Excluding rhinolophid bats has no effect on model performance, suggesting that any potentially different evolutionary pressures on the ACE2 sequences of putative sarbecovirus reservoirs compared to other species did not negatively affect our models.

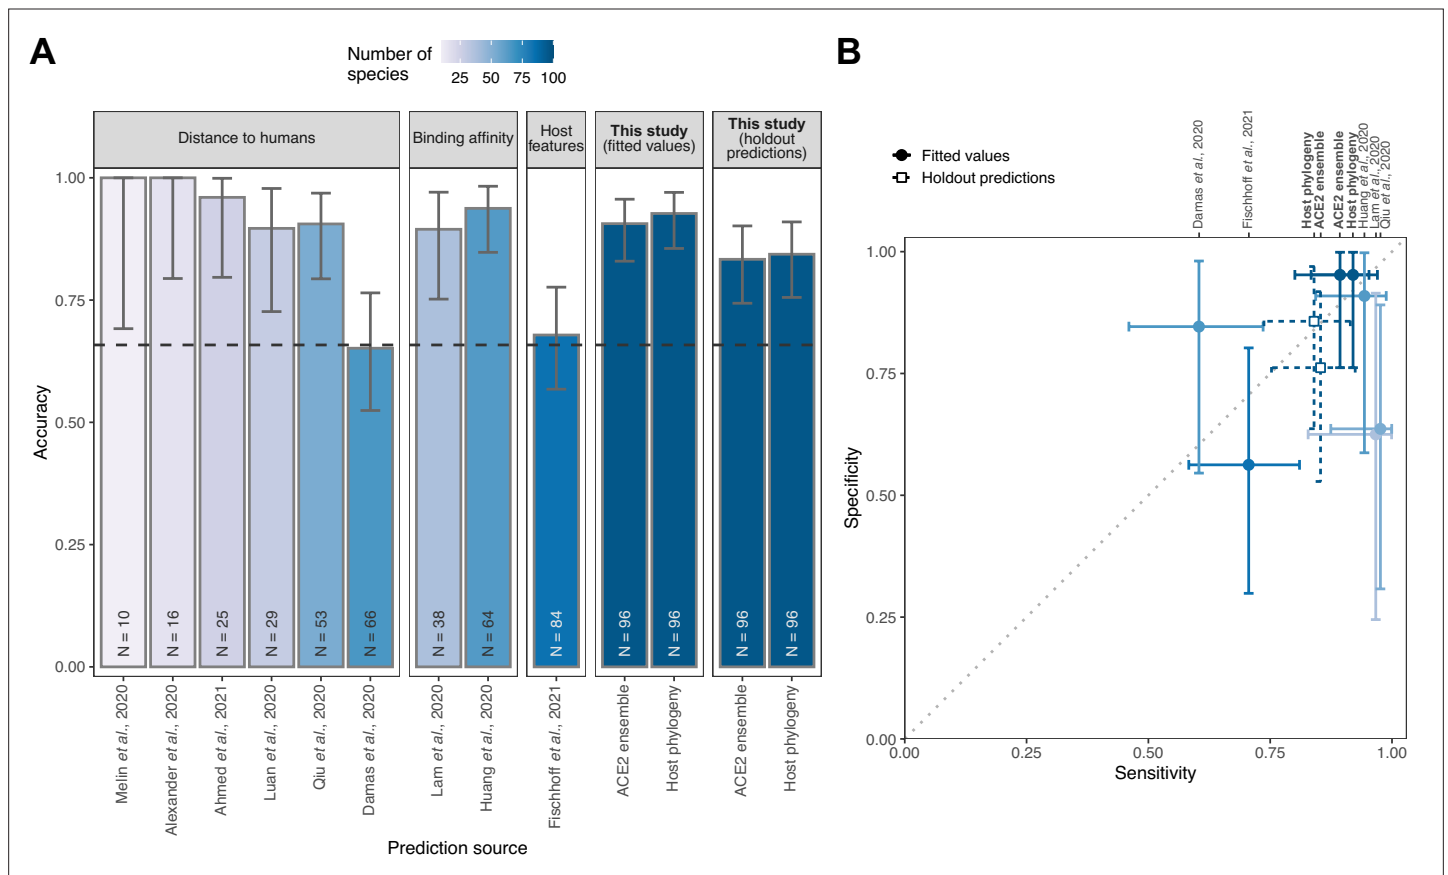

**Figure 4.** Performance of existing heuristics on our susceptibility data. **(A)** Overall accuracy, based on all species in our data for which predictions were available in each study. Accuracy measurements are arranged by increasing sample size, also indicated in colour. A dashed line indicates the performance expected from a null model which assigns labels in proportion to the frequency of susceptible species observed in the full training dataset. Note that variation in the number of species and the exact focus of predictions across studies necessitates cautious interpretation of performance metrics. **(B)** Trade-offs between sensitivity and specificity. A dotted line indicates balanced sensitivity and specificity, colours as in **(A)**. For clarity, only studies providing predictions for  $\geq 30$  species in our data are shown. In both panels, error bars represent 95% binomial confidence intervals. Earlier studies provided no formal metrics of model performance and used fixed cutoff values selected based on observed susceptibility in the predicted species, rather than from independent data. This makes it impossible to calculate performance metrics directly comparable to the formal holdout-based measures used in this study. To allow comparison, we therefore include the equivalent measures of performance based on training data for our models ('fitted values'), including the best-performing ACE2-based model (AA consensus distance/AA consensus distance ensemble) and the host phylogeny-based model. Note, however, that all such measures will overestimate performance on new taxa. Performance metrics based on 'holdout predictions' (**Figure 2**) provide a more generalisable view of future performance.

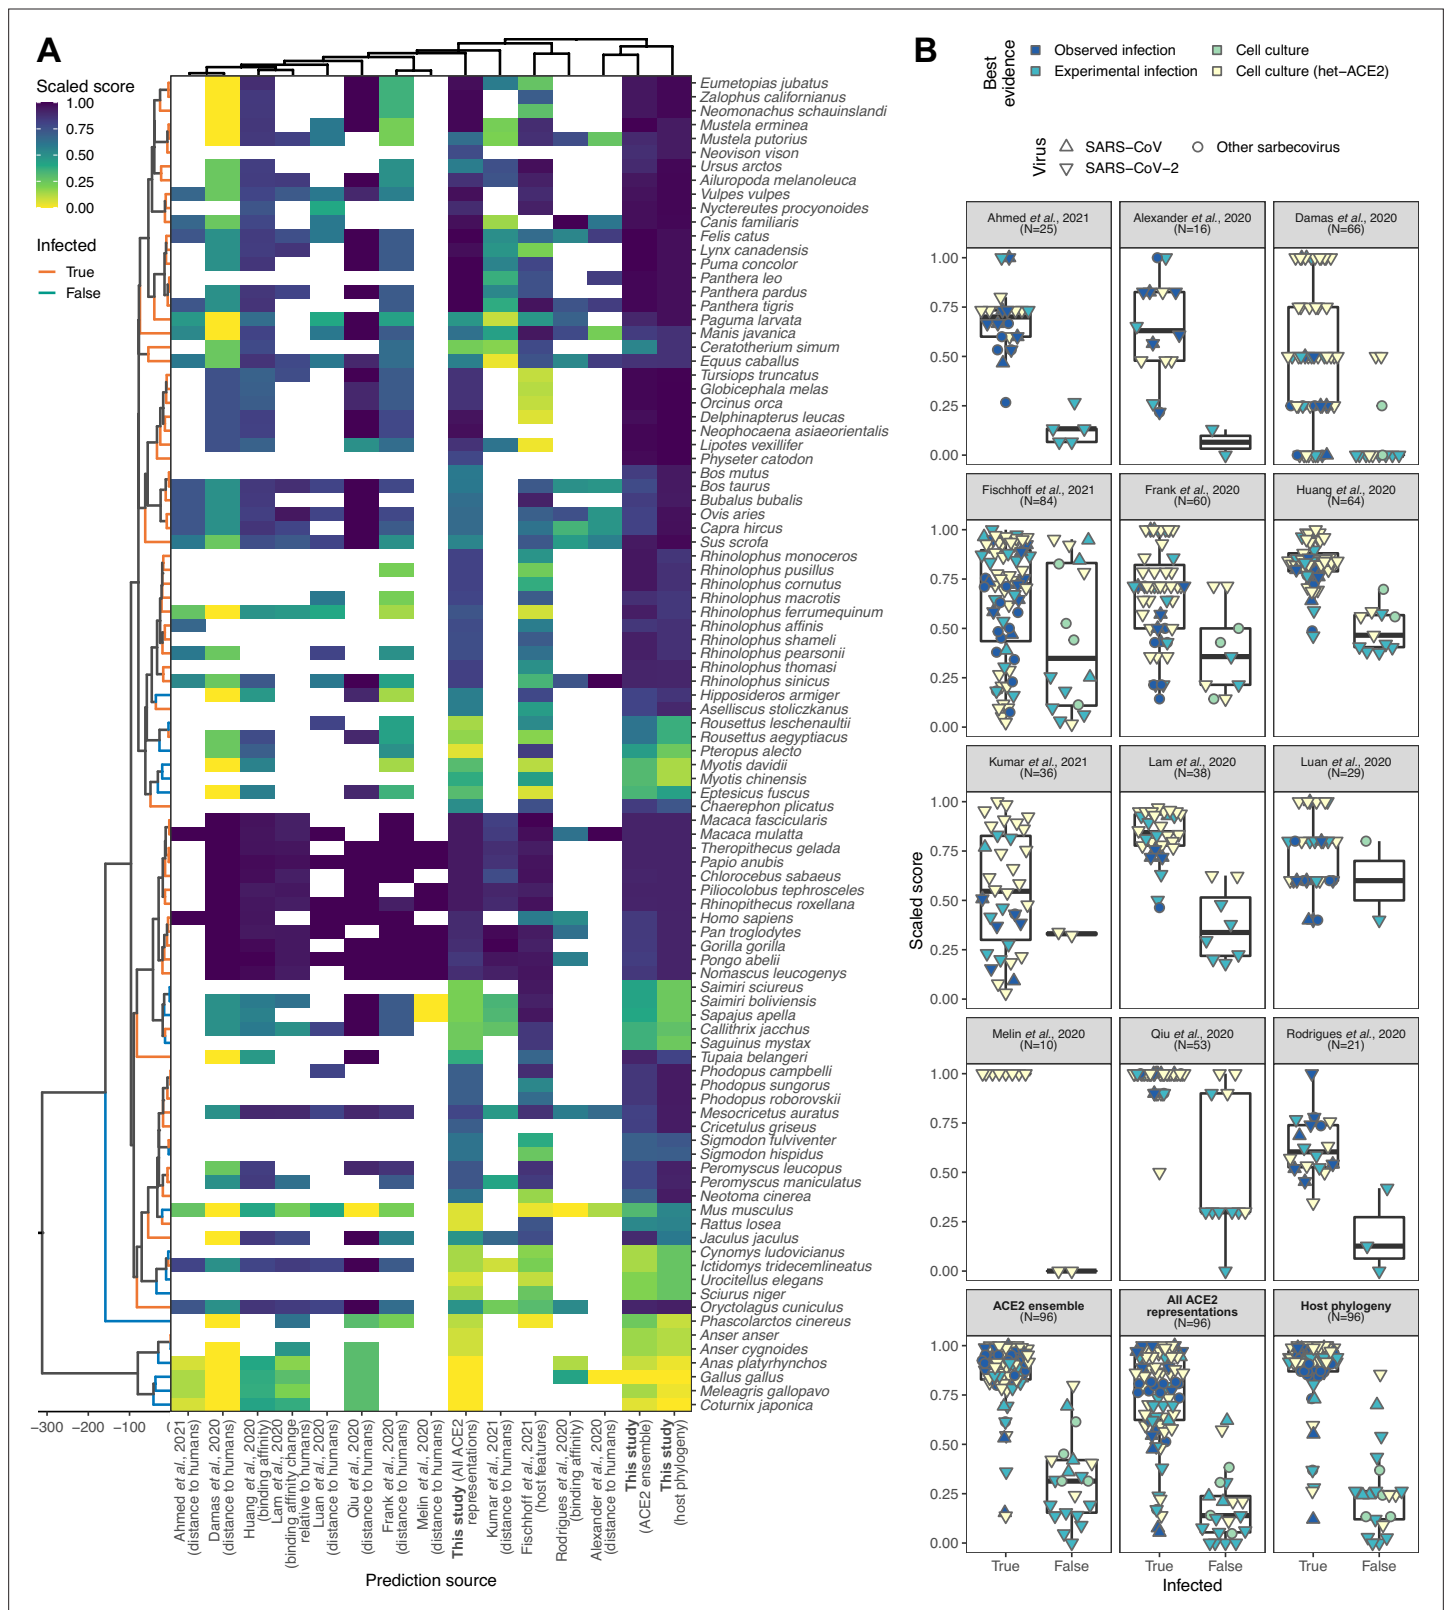

**Figure 4—figure supplement 1.** Comparison of predictions across studies and models. **(A)** Heatmap comparing overlapping quantitative predictions for the same species across studies, where susceptibility is known. Quantitative scores from all studies were re-scaled to lie in [0, 1] to allow comparison. A time-scaled phylogeny along the left edge shows evolutionary relationships between species (derived from TimeTree, scale bar indicates millions of years), while the hierarchical clustering dendrogram above the heatmap shows similarities between studies based on pairwise Spearman correlations. **Figure 4—figure supplement 1 continued on next page**

*Figure 4—figure supplement 1 continued*

( $\rho$ ) across all overlapping species (including species with unknown susceptibility). **(B)** Ability of different heuristics to separate known susceptible and non-susceptible species. Boxplots were calculated using one observation per species, but overlapping symbols at the same position are used to indicate known susceptibility or non-susceptibility to multiple viruses. To allow comparison with published heuristics, the displayed quantitative scores from this study were taken from models fitted to all data, meaning they represent fitted values rather than holdout predictions. This matches the way quantitative scores were produced in earlier heuristics; all other plots use holdout predictions. Clustering of our 'All ACE2 representations' model in the midst of previously published heuristics (panel A, maximum  $\rho = 0.744$ ) confirms that our ACE2-based models capture the bulk of currently used approaches for predicting sarbecovirus host range as intended, meaning our formal holdout-based results showing an inability of ACE2-based models to outperform phylogeny likely extends to these earlier heuristics (also visible in **(B)**).

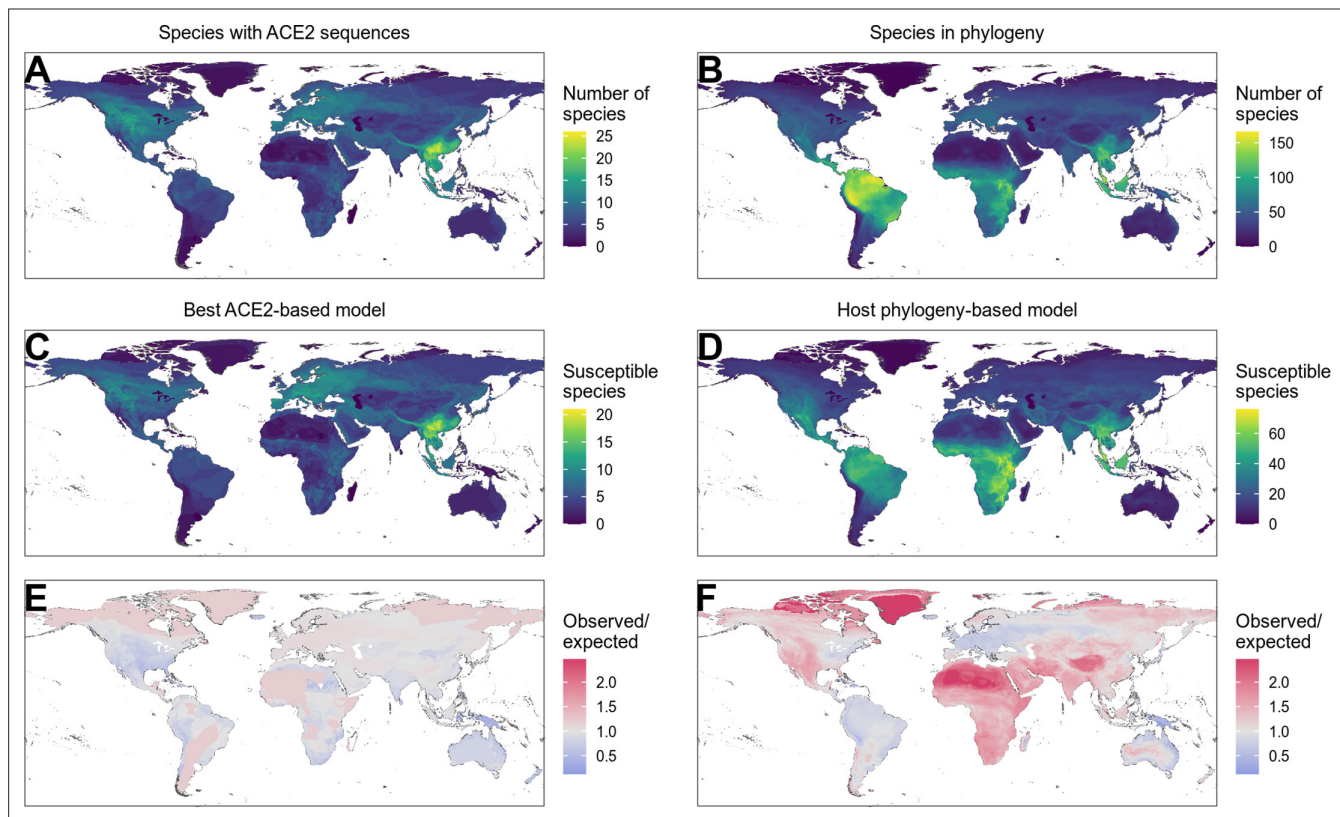

**Figure 5.** Distribution of wild terrestrial mammals predicted as susceptible depends on input data and model choice. (A–B) Number of species available for prediction by (A) ACE2-based models (limited by ACE2 availability) and (B) phylogeny-based models (nearly all mammals, in this figure limited primarily by the availability of IUCN range data). (C–D) Number of species predicted to be susceptible by (C) the best ACE2-based model (AA consensus distance/AA consensus distance ensemble), and (D) the host phylogeny-only model (phylogenetic eigenvectors). (E–F) Observed over expected ratio comparing the proportion of species in each location predicted as susceptible to the baseline expectation in which the overall proportion of mammal species predicted as susceptible by the relevant model is distributed homogeneously. Values below one indicate a lower proportion than expected, while values above one indicate a higher proportion than expected (i.e., putative hotspots of susceptibility). (E) Predictions from the best ACE2-based model; (F) predictions from the phylogeny-only model.



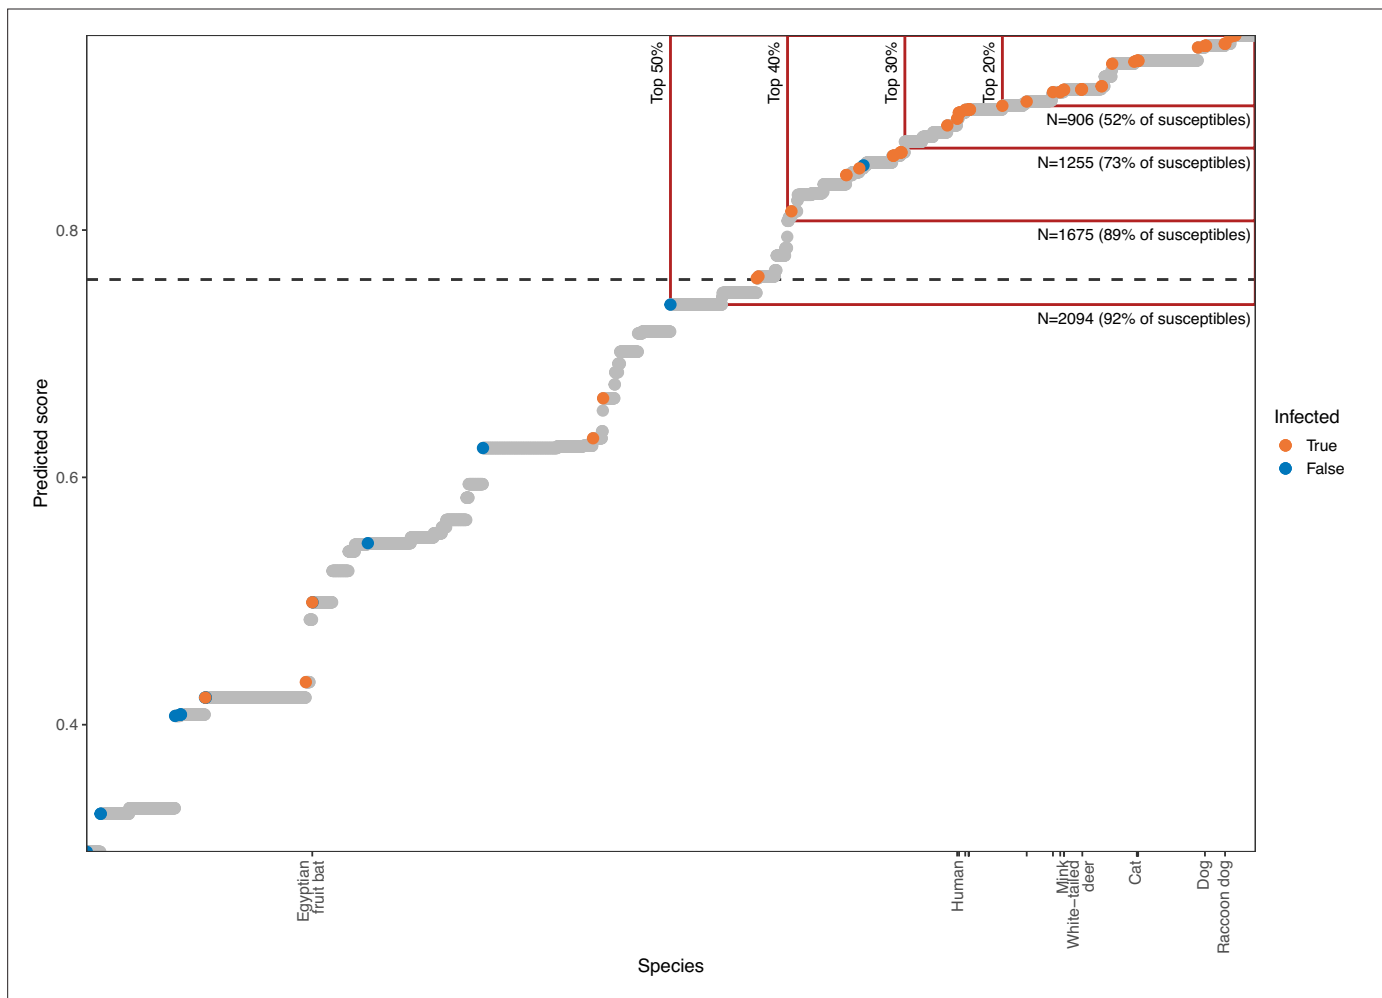

**Figure 5—figure supplement 1.** Estimating the value of quantitative susceptibility predictions from the phylogeny-only model for guiding surveillance. Mammal species are arranged by model output, with higher scores indicating species predicted as more likely to be susceptible to sarbecovirus infection. A dashed line shows the optimised cutoff beyond which species were predicted as susceptible. Colours indicate known susceptible or non-susceptible species. Tick marks along the x-axis indicate the location of species known to also shed infectious virus after infection, with a limited selection of species labelled for orientation. Red boxes highlight the effect of focusing surveillance effort on the top-ranked species only, with the percentage of all species included indicated by vertical labels. Horizontal labels highlight the number of mammal species included by each cutoff, with the proportion of all known susceptible species included indicated in parentheses. Attempts to limit the number of species requiring surveillance to feasible numbers by focusing only on the most confident predictions risks missing large numbers of susceptible species.

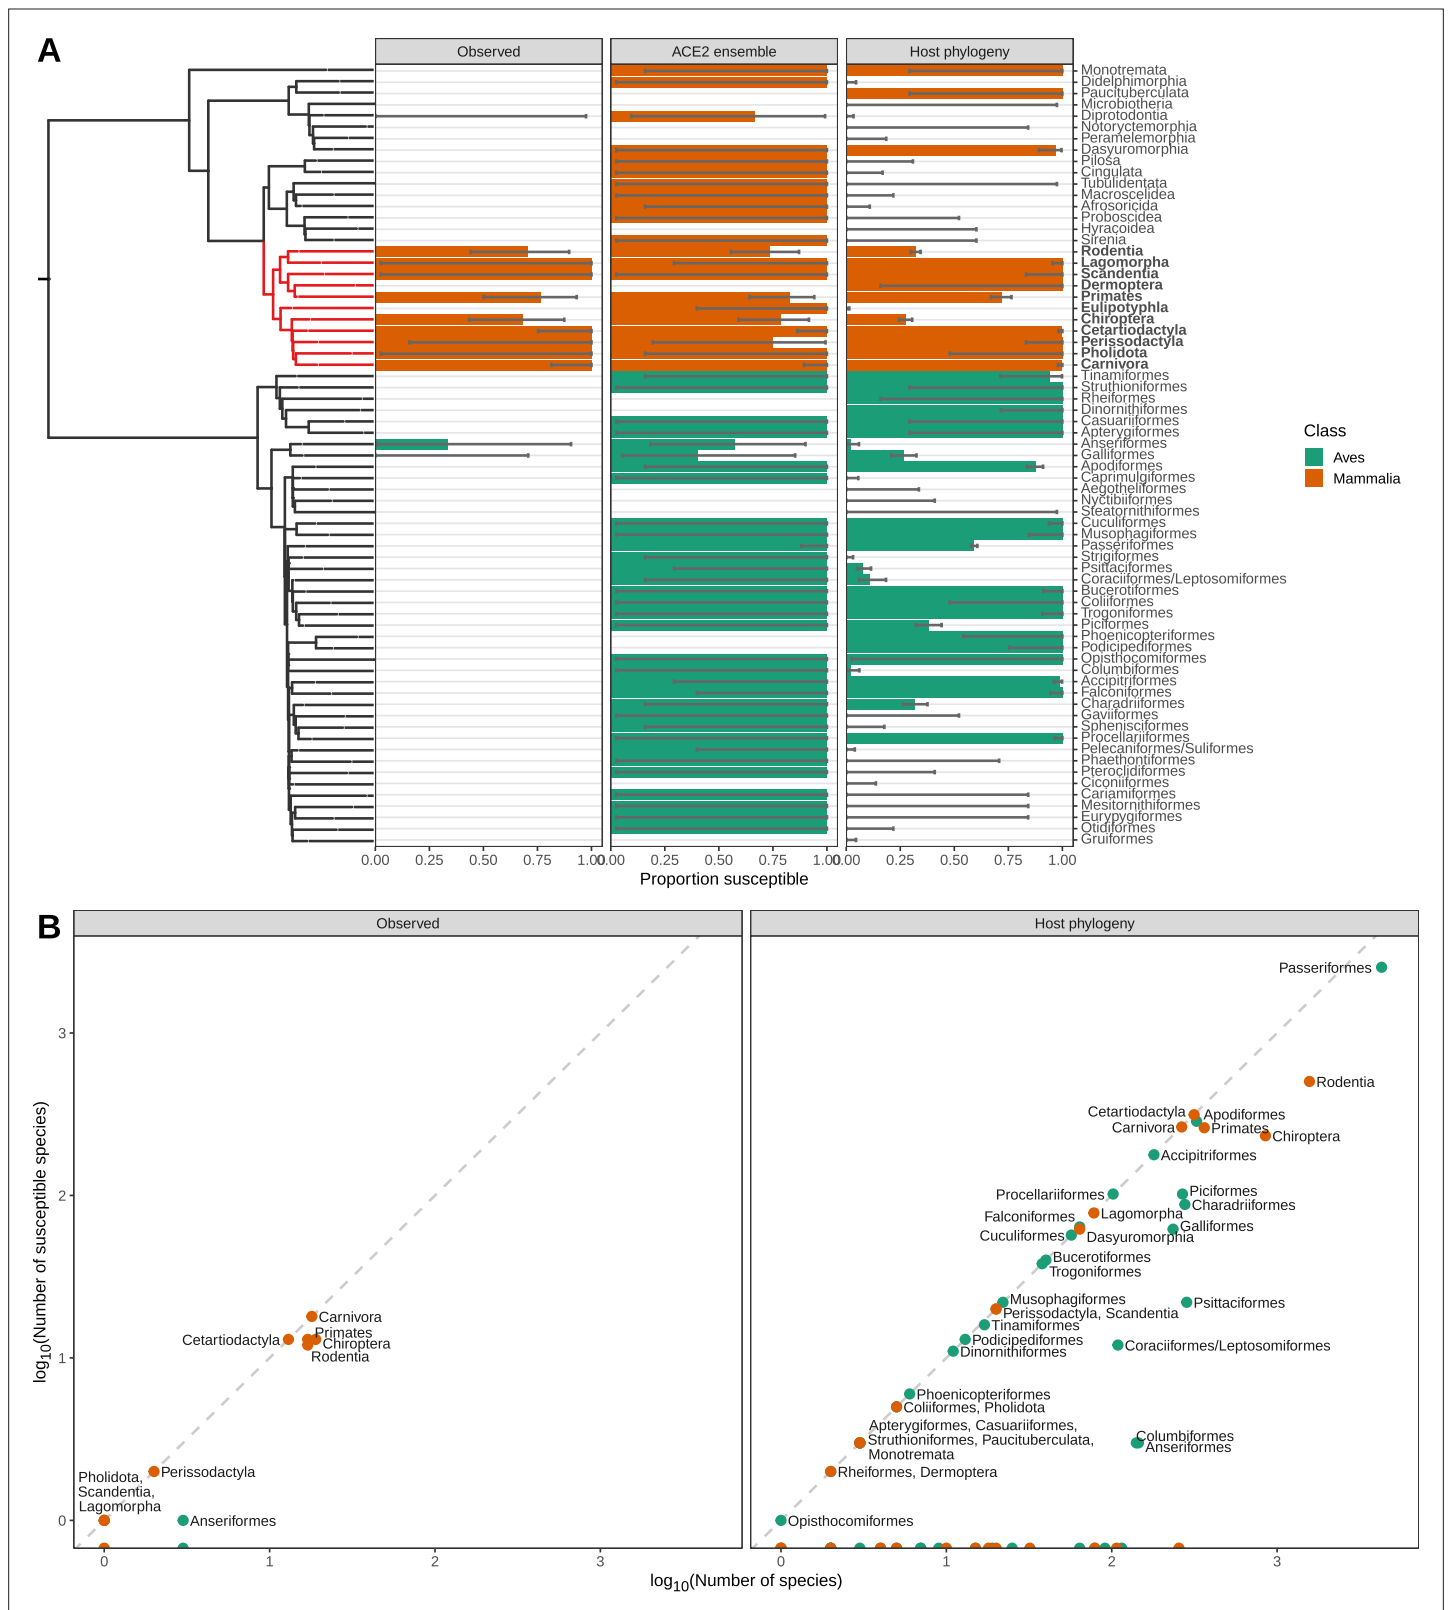

**Figure 5—figure supplement 2.** Species observed and predicted as susceptible to sarbecovirus infection, aggregated by taxonomic order. (A) Proportion of species either observed or predicted to be susceptible by different models. Error bars indicate 95% binomial confidence intervals. A time-scaled phylogeny illustrates divergence patterns between groups (derived from TimeTree). Taxonomic orders which were polyphyletic in this phylogeny were merged, and are indicated using a forward-slash (e.g., Coraciiformes/Leptosomiformes). Red branches and bold labels highlight

Figure 5—figure supplement 2 continued on next page

Figure 5—figure supplement 2 continued

the Boreoeutheria clade. **(B)** Relationship between the number of susceptible species in each taxonomic order and the size of each order. Models can exclude some taxonomic orders from requiring surveillance, but most orders which do contain susceptible species show limited variation in susceptibility. This limits our ability to target surveillance below the taxonomic order level (but see **Figure 5—figure supplement 3**).

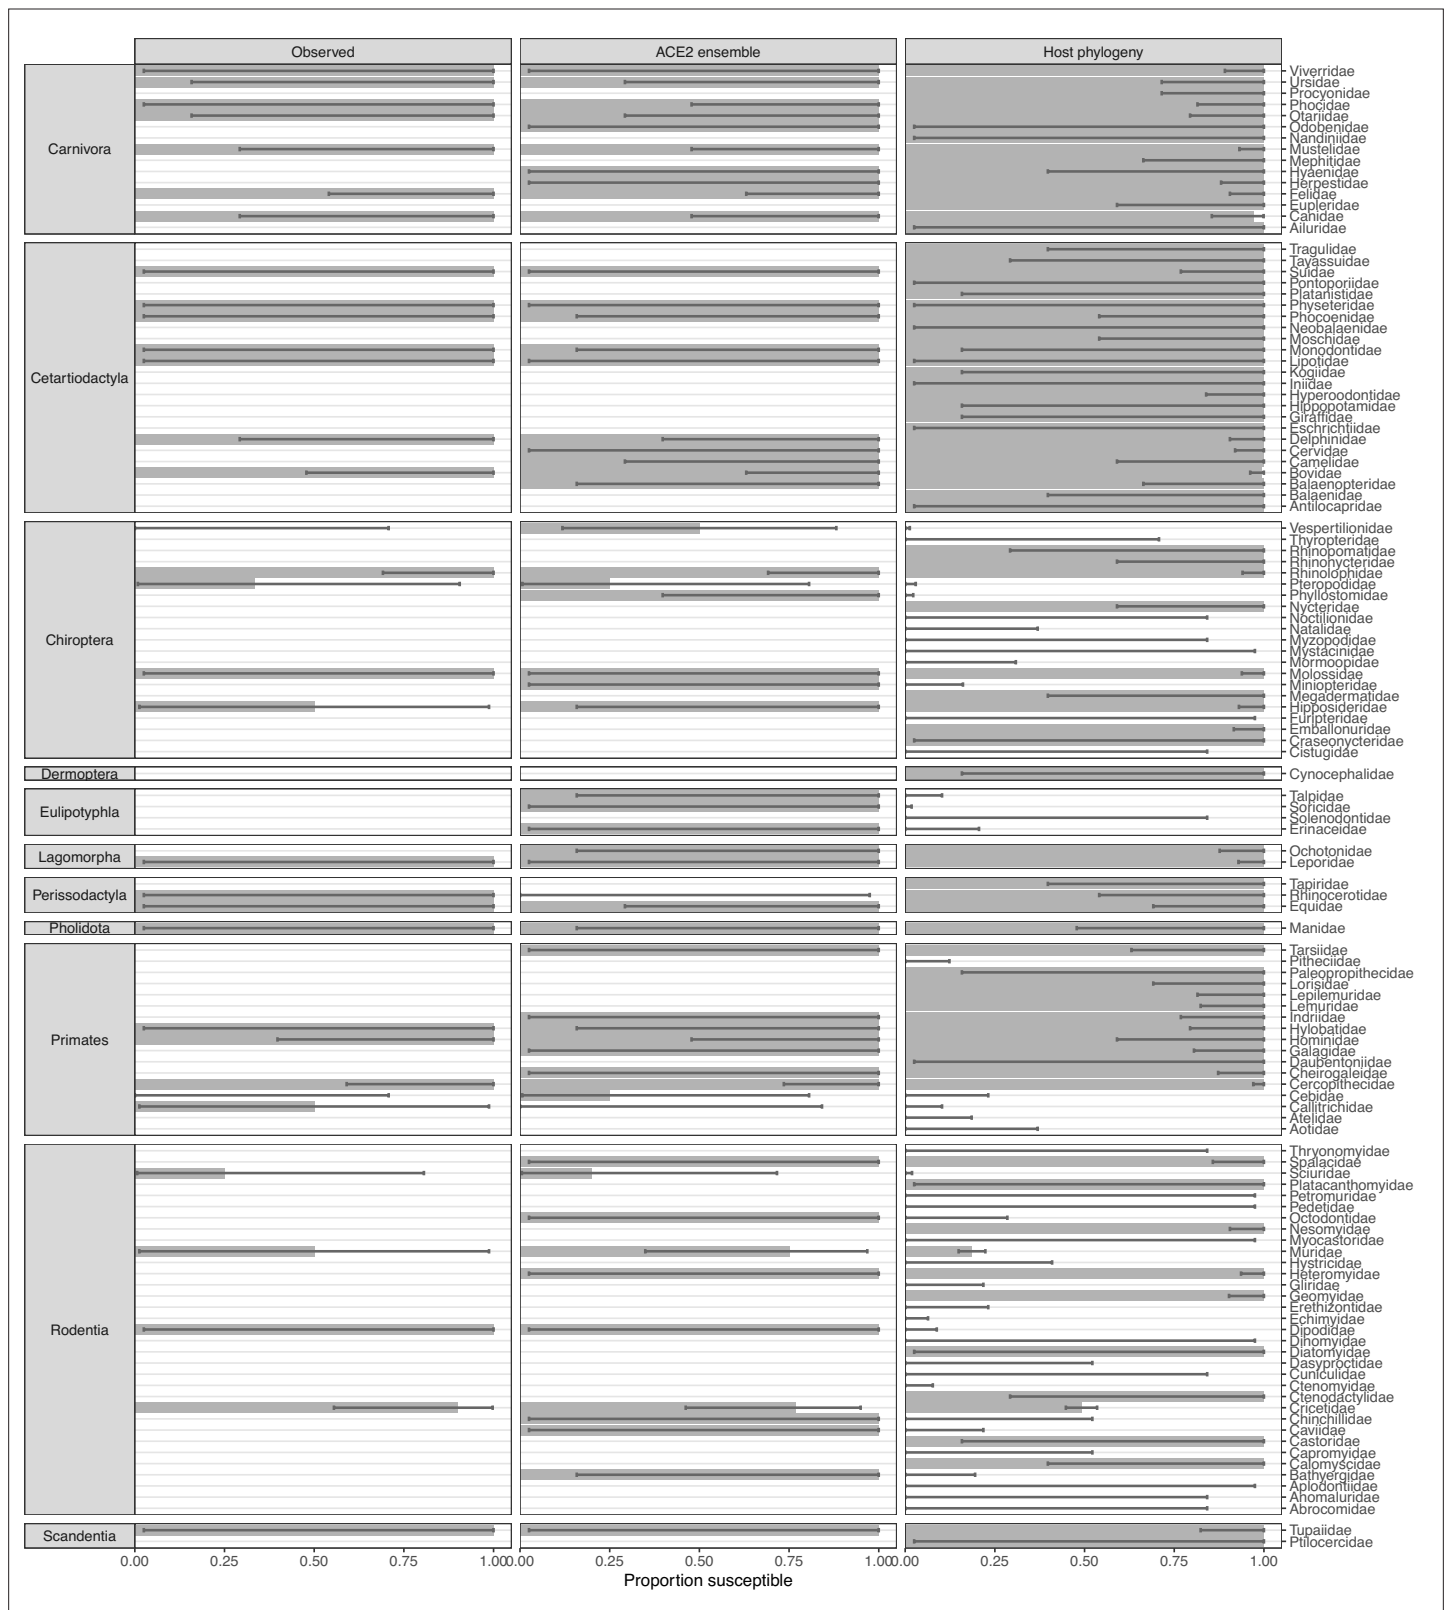

**Figure 5—figure supplement 3.** Proportion of species observed or predicted to be susceptible to sarbecovirus infection in boreoeutherian families. All taxonomic orders within the Boreoeutheria clade containing at least one observed or predicted susceptible species are shown. Error bars indicate 95% binomial confidence intervals. The Chiroptera and Rodentia orders include several families predicted to contain no susceptible species, but both current observations and model predictions suggest little variation in susceptibility below the family level.

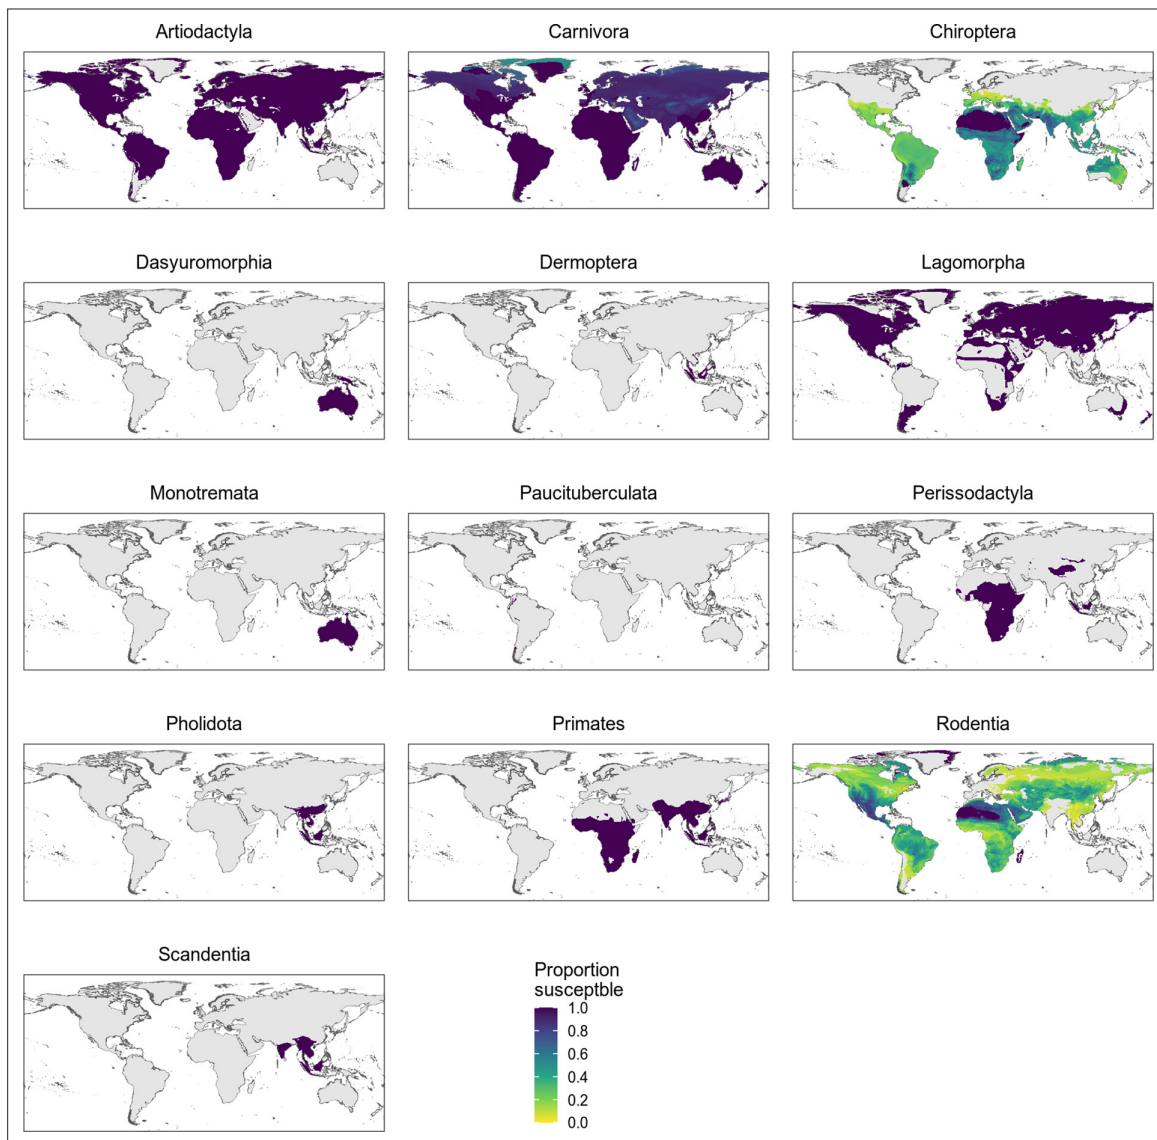

**Figure 5—figure supplement 4.** Distribution of wild terrestrial mammals predicted as susceptible by the phylogeny-only model, separated by taxonomic order. All taxonomic orders within the Boreoeutheria clade containing at least one species predicted as susceptible are shown. Only bats and rodents show variation, likely due to family-level differences in susceptibility (**Figure 5—figure supplement 3**).
